# Supplementary material
Source: Research Square preprint supplement (doi:10.21203/rs.3.rs-8606613/v1)
Supplement: Supplementary file 1 [file 53b99380d06c6ffaece2c81f.docx]

**Supplementary Figures**


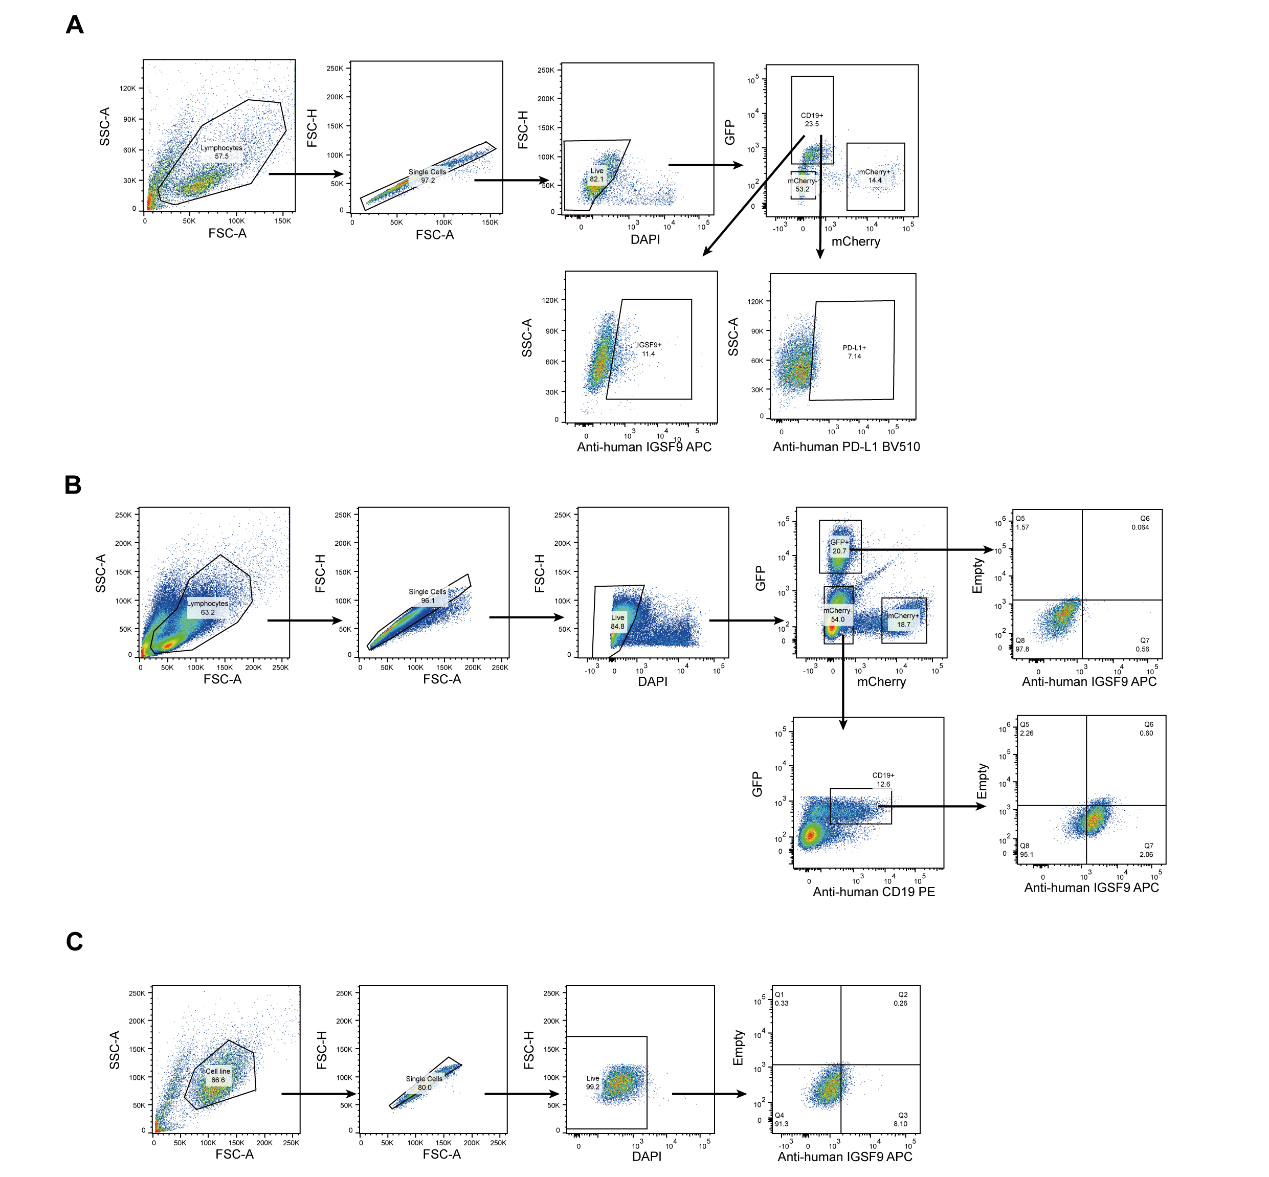


**Supplementary Figure S1. Flow Cytometry Gating Strategies for In Vitro CAR-T/AML Co-cultures** (Related to Figure 1).
**(A)** Analysis of CAR-T cells co-cultured with MOLM13-CD19 cells.
**(B)** Analysis of CAR-T cells co-cultured with a MOLM13-GFP/MOLM13-CD19 cell mixture.
**(C)** Analysis of AML cells treated with conditioned medium from MOLM13/CAR-T co-cultures.


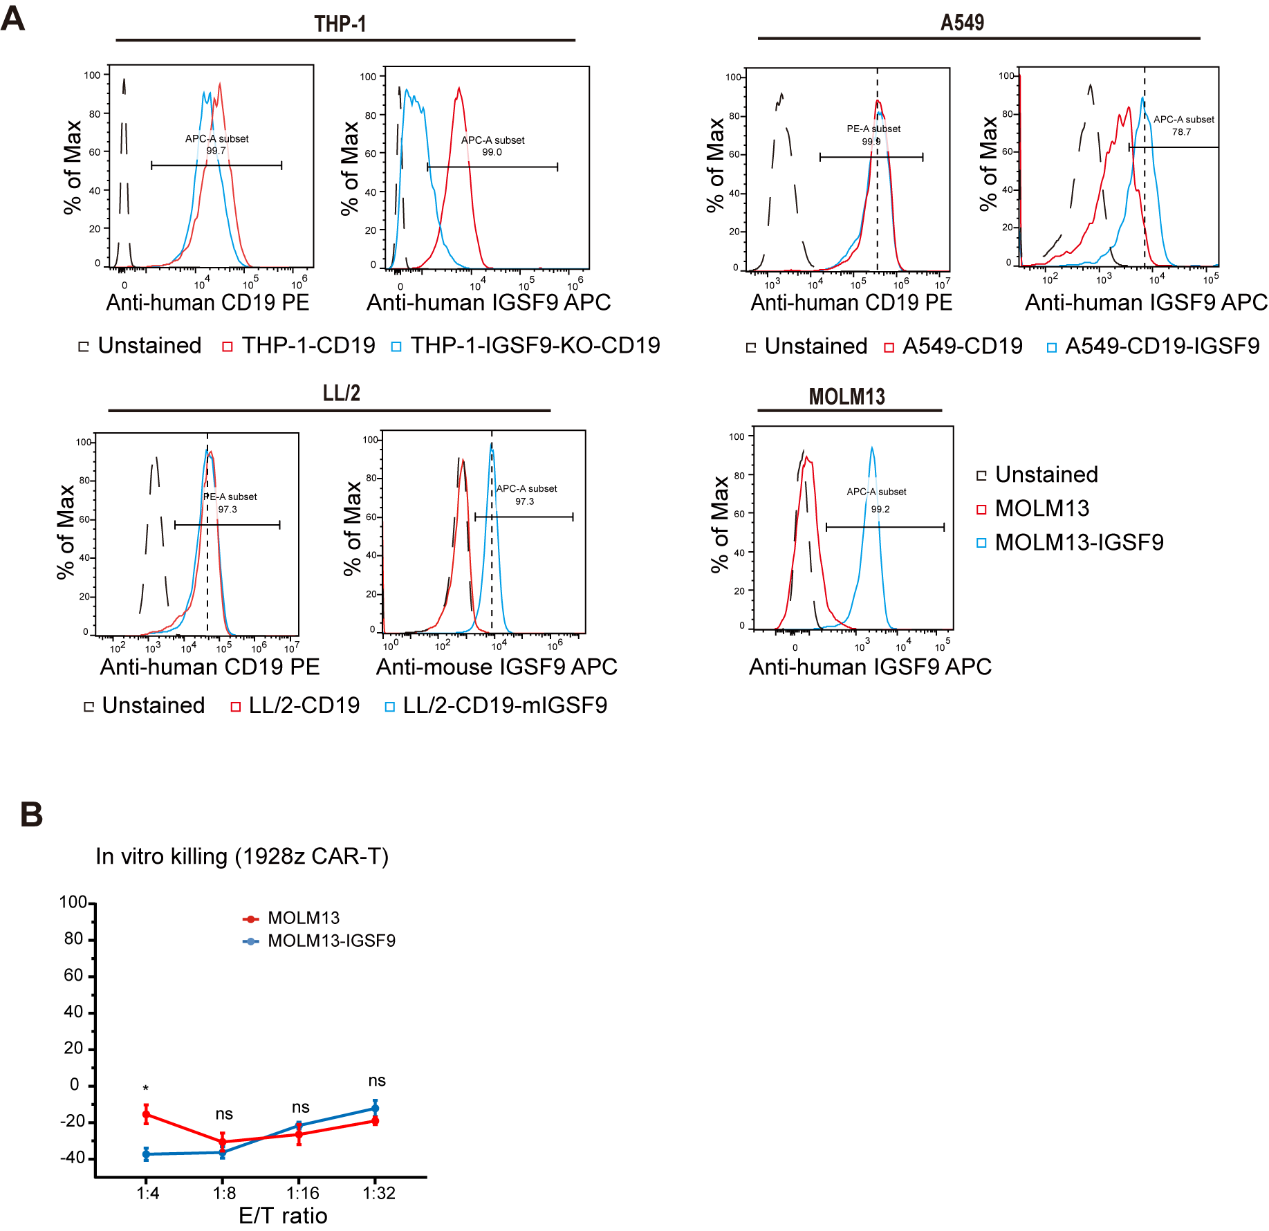


**Supplementary Figure S2. Target cells preparation and cytotoxicity assay** (Related to Figure 2).
**(A)** Generation of CAR-T target cells with different IGSF9 expression. Surface expression of CD19 or IGSF9 on THP-1, A549, LL/2 and MOLM13 cells was verified by flow cytometry.

**(B)** Cytotoxicity of 1928z CAR-T cells against MOLM13 versus MOLM13 overexpressing IGSF9 (MOLM13-IGSF9).


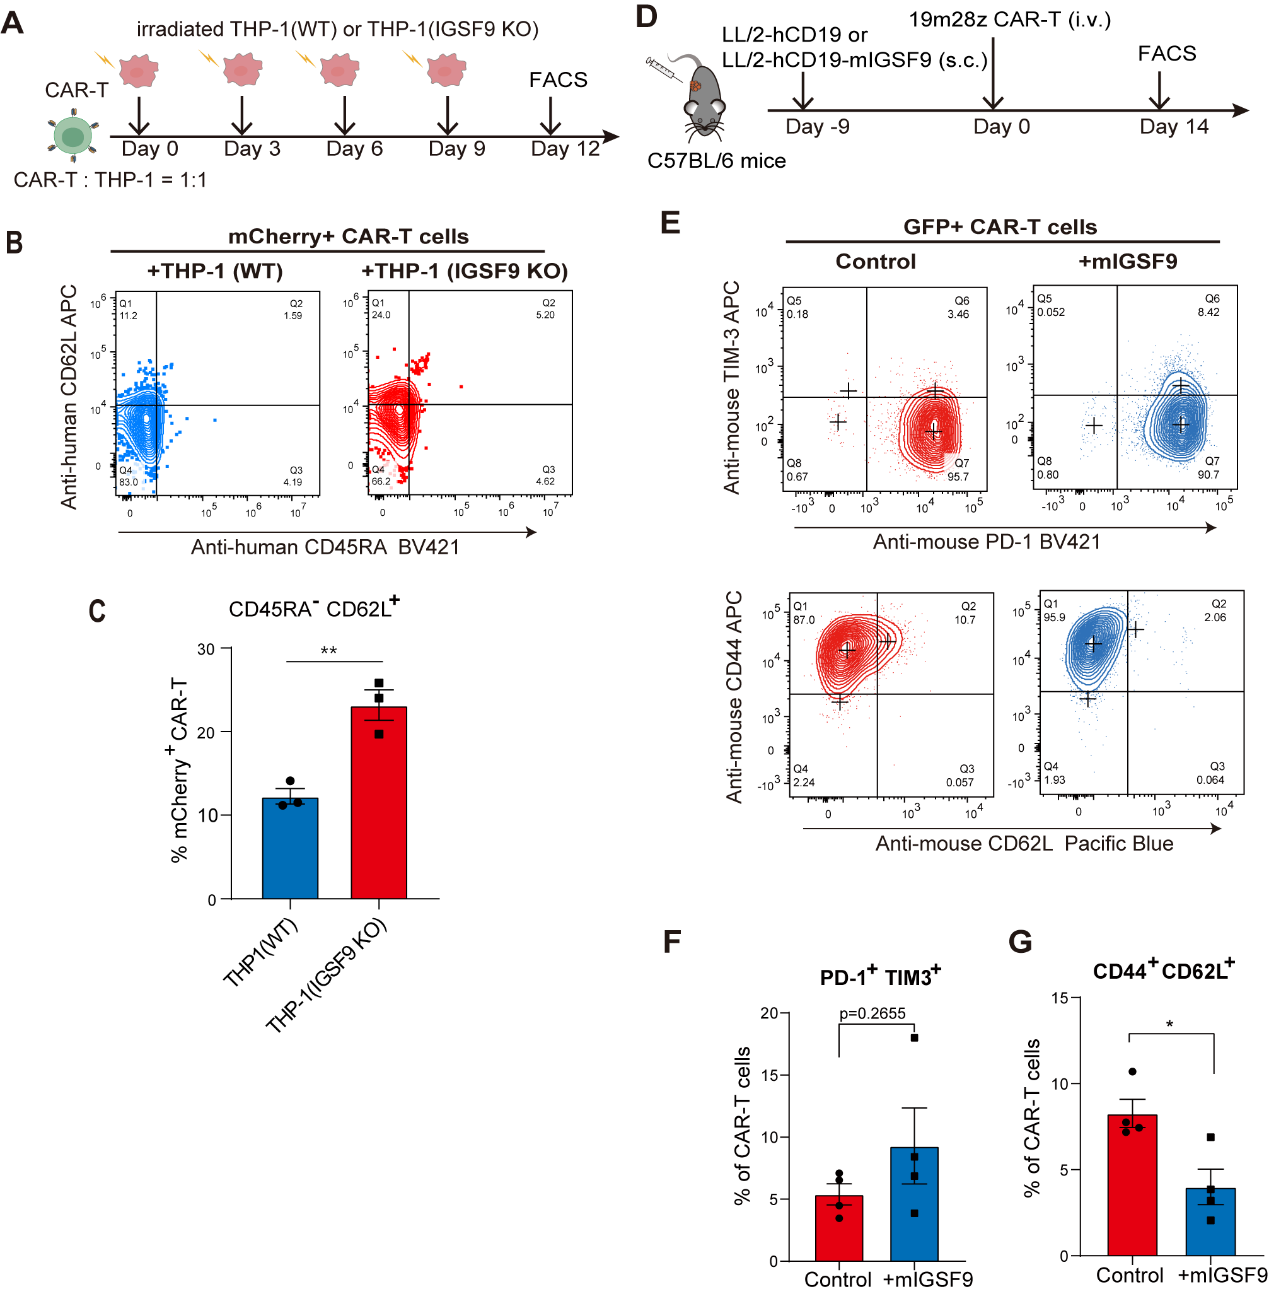


**Supplementary Figure S3. IGSF9 Expression on Tumor Cells impaired CAR-T cells persistence.**

**(A-C)** CD33-specific CAR-T cells were repeatedly stimulated with irradiated THP-1 (WT) or THP-1 (IGSF9 KO) cells at a ratio of 1:1 for four rounds (three days per round) (B). Representative flow cytometry of differentiation markers on mCherry+ CAR-T cells.

**(C)** Quantification of central memory (CD45RA-CD62L+) CAR-T cells from (B) (mean ± SEM; n=3).
**(D, E)** C57BL/6 mice engrafted with LL2-CD19 or LL2-CD19-mIGSF9 tumors were treated with GFP+ mouse 19m28z CAR-T cells (D). After two weeks, exhaustion and differentiation markers on tumor-infiltrating GFP+ CAR-T cells were analyzed by flow cytometry (E).
**(F)** Quantification of PD-1+TIM-3+ exhausted CAR-T cells from (E) (mean ± SEM; n=4 mice per group for E).
**(G)** Quantification of central memory (CD44+CD62L+) CAR-T cells from (E) (mean ± SEM; n as in F).


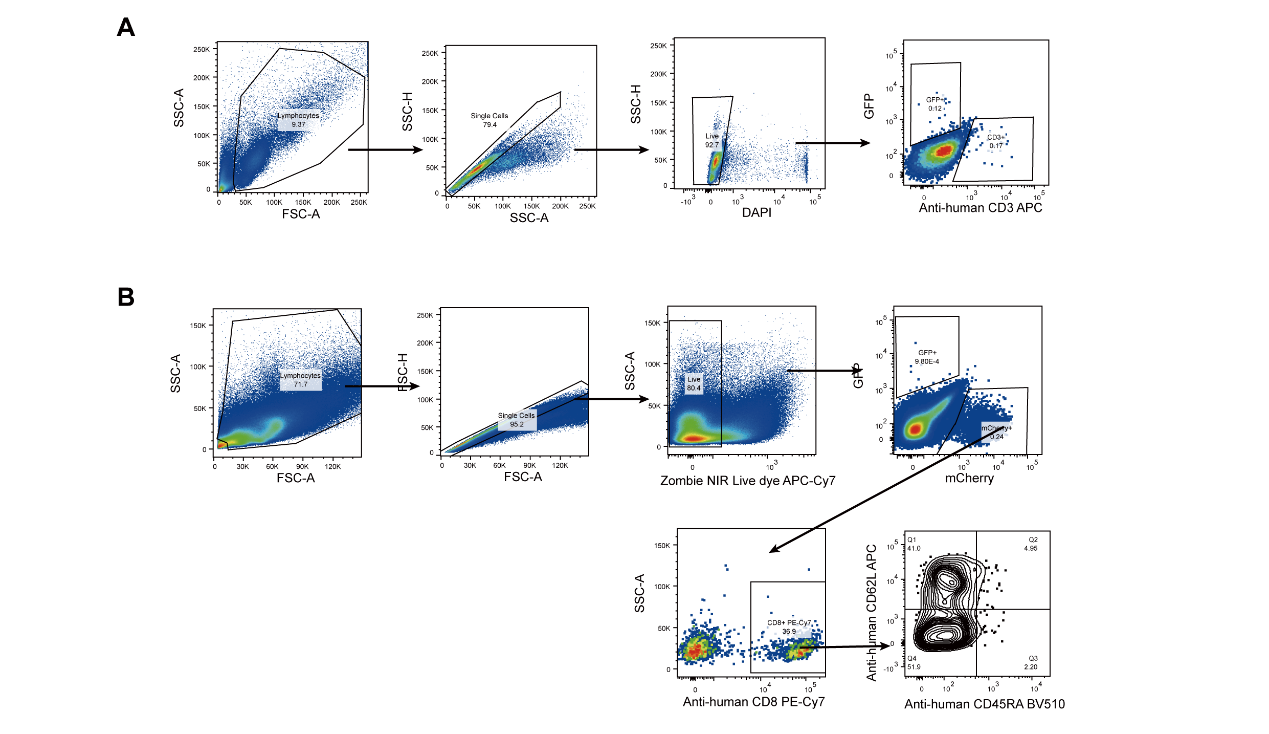


**Supplementary Figure S4. Flow Cytometry Gating Strategies for In Vivo CAR-T/Tumor Analysis** (Related to Figure 4).
**(A)** Analysis of peripheral blood CD3⁺ T cells and GFP⁺ tumor cells in NSG mice.
**(B)** Analysis of CAR-T cells (mCherry⁺) in spleen and bone marrow of NSG mice.


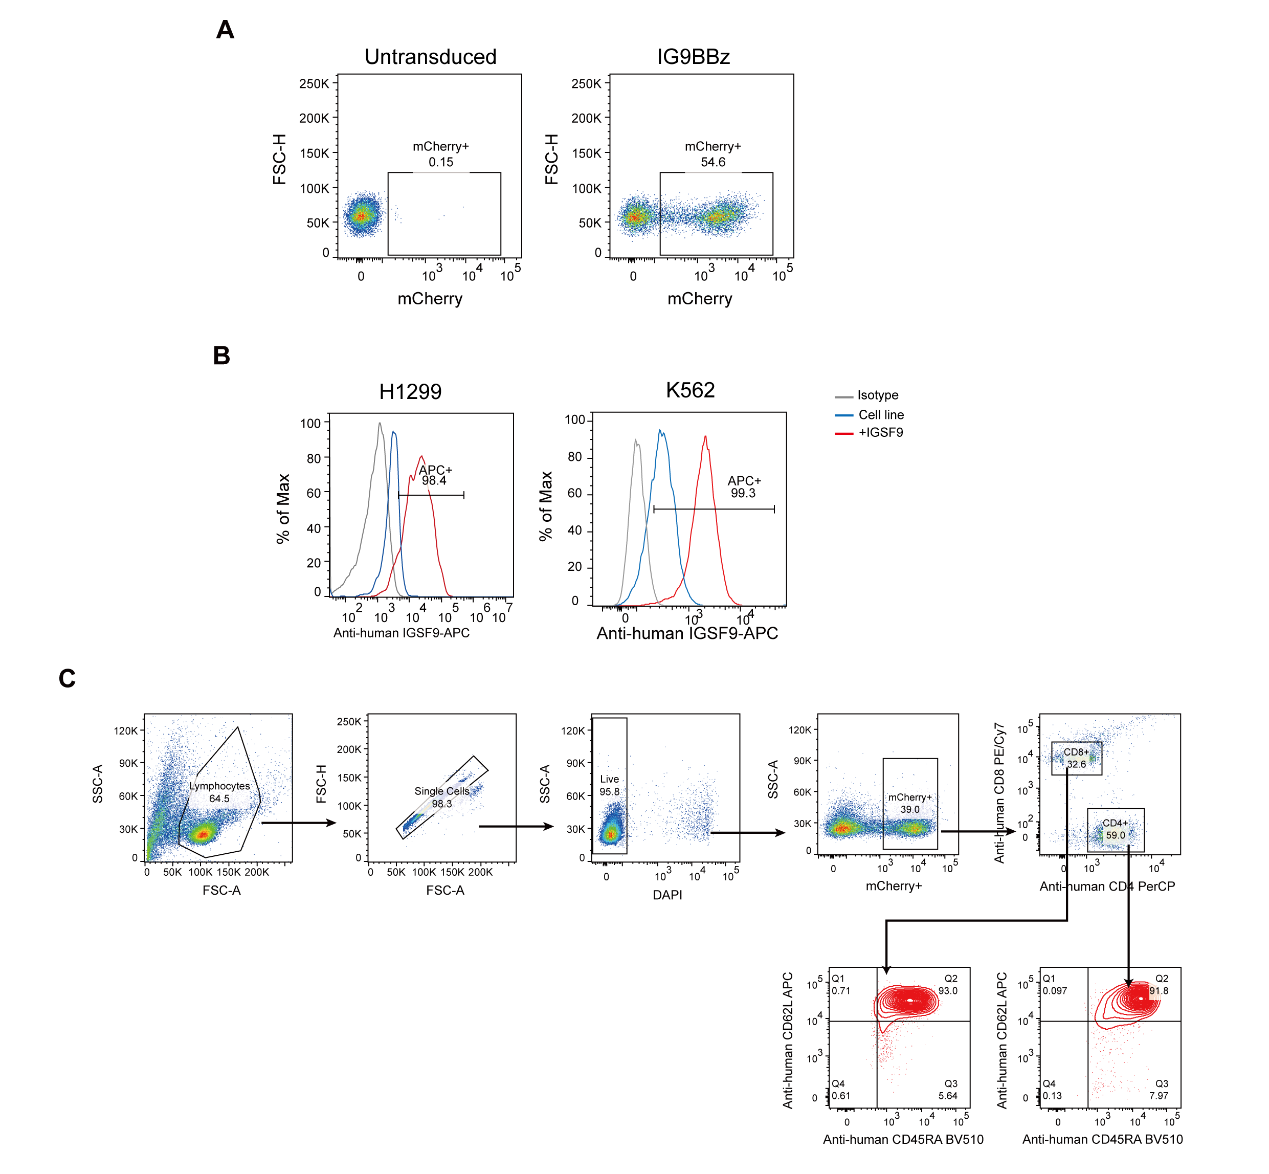


**Supplementary Figure S5. Validation of IGSF9-Specific CAR-T Function** (Related to Figure 5).
**(A)** Generation of IG9BBz CAR-T cells from human PBMCs.
**(B)** Generation of IGSF9-overexpressing H1299 and K562 cell lines.
**(C)** Differentiation analysis of CAR-T cells after co-culture with K562 or K562-IGSF9 cells.


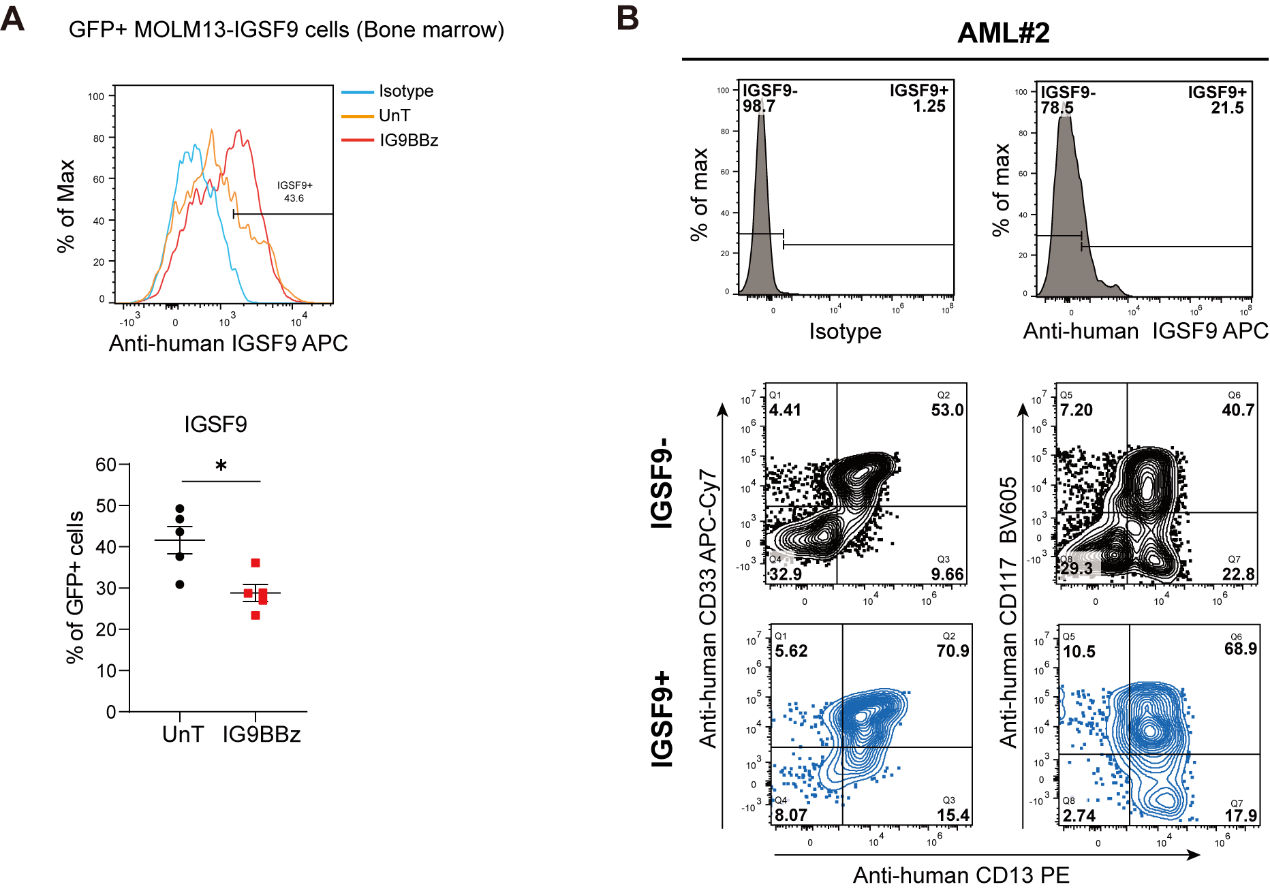


**Supplementary Figure S6. Validation of IGSF9-Specific CAR-T Function** (Related to Figure 6, 7).

1. IGSF9 expression of the residual GFP+ tumor cells in bone marrow of mice were detected by flow cytometry (mean ± SEM; n=4 mice per group)
2. AML-related markers expression of a patient-derive AML sample. The CD13, CD33 and CD117 expression of IGSF9- and IGSF9+ populations were compared by flow cytometry.
